# Supplementary material
Source: ML conference proceedings conference paper supplement (https://proceedings.mlr.press/v80/kleinberg18a.html)
Supplement: Supplementary file 1 [file kleinberg18a-supp.pdf]

## A. Discussions on one point convexity

If  $f$  is  $\delta$ -one point strongly convex around  $x^*$  in a convex domain  $\mathcal{D}$ , then  $x^*$  is the only local minimum point in  $\mathcal{D}$  (i.e., global minimum).

To see this, for any fixed  $x \in \mathcal{D}$ , look at the function  $g(t) = f(tx^* + (1-t)x)$  for  $t \in [0, 1]$ , then  $g'(t) = \langle \nabla f(tx^* + (1-t)x), x^* - x \rangle$ . The definition of  $\delta$ -one point strongly convex implies that the right side is negative for  $t \in (0, 1]$ . Therefore,  $g(t) > g(1)$  for  $t > 0$ . This implies that for every point  $y$  on the line segment joining  $x$  to  $x^*$ , we have  $f(y) > f(x^*)$ , so  $x^*$  is the only local minimum point.

## B. Proof for Lemma 5

*Proof.* Recall that we want to show

$$\frac{\sqrt{2}(3.5\eta^2r^2 + 7\eta r\delta)}{\sqrt{\eta c}} \log^{\frac{1}{2}}(\zeta) + \frac{21b}{\lambda} \leq \delta^2 = \frac{\mu^2 b}{\lambda} = \frac{\mu^2 \eta^2 r^2 (1 + \eta L)^2}{\lambda}$$

On the left hand side there are three summands. Below we show that each of them is bounded by  $\frac{\mu^2 b}{3\lambda}$ <sup>6</sup>.

Since  $\mu \geq \max\{8, 42 \log^{\frac{1}{2}}(\zeta)\}$ , we know  $\frac{21b}{\lambda} \leq \frac{63b}{3\lambda} < \frac{8^2 b}{3\lambda} \leq \frac{\mu^2 b}{3\lambda}$ . Next, we have

$$\begin{aligned} 42 \log^{\frac{1}{2}}(\zeta) &\leq \mu \\ \Rightarrow \sqrt{30 \log^{\frac{1}{2}}(\zeta) \eta^{0.5} c^{0.5}} &\leq \mu \\ \Rightarrow 15 \log^{\frac{1}{2}}(\zeta) &\leq \frac{\mu^2}{2\eta^{0.5} c^{0.5}} \\ \Rightarrow \frac{15}{\sqrt{c}} \log^{\frac{1}{2}}(\zeta) &\leq \frac{\mu^2 \eta^{0.5}}{\lambda} \\ \Rightarrow \frac{3.5\sqrt{2}\eta^{1.5}r^2}{\sqrt{c}} \log^{\frac{1}{2}}(\zeta) &\leq \frac{\mu^2 \eta^2 r^2}{3\lambda} \\ \Rightarrow \frac{3.5\sqrt{2}\eta^2 r^2}{\sqrt{\eta c}} \log^{\frac{1}{2}}(\zeta) &\leq \frac{\mu^2 \eta^2 r^2 (1 + \eta L)^2}{3\lambda} \end{aligned}$$

Finally,

$$\begin{aligned} 42 \log^{\frac{1}{2}}(\zeta) &\leq \mu \\ \Rightarrow \frac{42}{\sqrt{c}} \log^{\frac{1}{2}}(\zeta) &\leq \mu \sqrt{\frac{1}{c}} \\ \Rightarrow \frac{7\sqrt{2}\eta r}{\sqrt{\eta c}} \log^{\frac{1}{2}}(\zeta) &\leq \frac{\mu \sqrt{\frac{\eta^2 r^2 (1 + \eta L)^2}{2\eta c}}}{3} \\ \Rightarrow \frac{7\sqrt{2}\eta r}{\sqrt{\eta c}} \log^{\frac{1}{2}}(\zeta) &\leq \frac{\delta}{3} \\ \Rightarrow \frac{7\sqrt{2}\eta r \delta}{\sqrt{\eta c}} \log^{\frac{1}{2}}(\zeta) &\leq \frac{\delta^2}{3} \end{aligned}$$

Adding the three summands together, we get the claim. □

<sup>6</sup>We made no effort to optimize the constants here.

### C. Proof for Theorem 3

*Proof.* Recall that we have  $x_{t+1} = x_t - \eta \nabla f(x_t)$ . Since we have  $\langle -\nabla f(x_t), x^* - x_t \rangle \leq c' \|x^* - x_t\|_2^2$ , then

$$\begin{aligned} \|x_{t+1} - x^*\|_2^2 &= \|x_t - \eta \nabla f(x_t) - x^*\|_2^2 \\ &= \|x_t - x^*\|_2^2 + \eta^2 \|\nabla f(x_t)\|_2^2 - 2\eta \langle \nabla f(x_t), x_t - x^* \rangle \\ &\geq (1 - 2\eta c') \|x_t - x^*\|_2^2 + \eta^2 \|\nabla f(x_t)\|_2^2 > \|x_t - x^*\|_2^2 \end{aligned}$$

Where the last inequality holds since we know  $\eta > \frac{2c' \|x_t - x^*\|_2^2}{\|\nabla f(x_t)\|_2^2}$ . □
